RESEARCH ARTICLE

# Assessment and Characterisation of Ireland's Green Tides (*Ulva* Species)

Alex H. L. Wan<sup>1</sup>, Robert J. Wilkes<sup>2</sup>, Svenja Heesch<sup>1</sup>, Ricardo Bermejo<sup>3</sup>, Mark P. Johnson<sup>1</sup>, Liam Morrison<sup>3\*</sup>

**1** Irish Seaweed Research Group, Ryan Institute and School of Natural Sciences, National University of Ireland, Galway, Co. Galway, Ireland, **2** Environmental Protection Agency, Castlebar, Co. Mayo, Ireland, **3** Earth and Ocean Sciences, Ryan Institute and School of Natural Sciences, National University of Ireland, Galway, Ireland

\* [liam.morrison@nuigalway.ie](mailto:liam.morrison@nuigalway.ie)

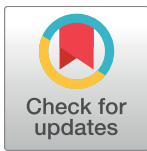

**OPEN ACCESS**

**Citation:** Wan AHL, Wilkes RJ, Heesch S, Bermejo R, Johnson MP, Morrison L (2017) Assessment and Characterisation of Ireland's Green Tides (*Ulva* Species). PLoS ONE 12(1): e0169049. doi:10.1371/journal.pone.0169049

**Editor:** Senjie Lin, University of Connecticut, UNITED STATES

**Received:** August 21, 2016

**Accepted:** December 9, 2016

**Published:** January 3, 2017

**Copyright:** © 2017 Wan et al. This is an open access article distributed under the terms of the [Creative Commons Attribution License](https://creativecommons.org/licenses/by/4.0/), which permits unrestricted use, distribution, and reproduction in any medium, provided the original author and source are credited.

**Data Availability Statement:** All relevant data are within the paper. All DNA sequences are available from GenBank (<https://www.ncbi.nlm.nih.gov/genbank/>) or ENA (<http://www.ebi.ac.uk/ena>). Please see Fig. 2 for accession numbers.

**Funding:** This work was supported by the Department of Agriculture, Food and the Marine MFFRI/07/01, Irish National Development Plan 2007-2013; National University of Ireland Galway, Thomas Crawford-Hayes Research Grant Award 2010; National Geoscience Programme 2007-2013; Beaufort Marine Research Award, Irish

## Abstract

Enrichment of nutrients and metals in seawater associated with anthropogenic activities can threaten aquatic ecosystems. Consequently, nutrient and metal concentrations are parameters used to define water quality. The European Union's Water Framework Directive (WFD) goes further than a contaminant-based approach and utilises indices to assess the Ecological Status (ES) of transitional water bodies (e.g. estuaries and lagoons). One assessment is based upon the abundance of opportunistic *Ulva* species, as an indication of eutrophication. The objective of this study was to characterise Ireland's *Ulva* blooms through the use of WFD assessment, metal concentrations and taxonomic identity. Furthermore, the study assessed whether the ecological assessment is related to the metal composition in the *Ulva*. WFD algal bloom assessment revealed that the largest surveyed blooms had an estimated biomass of 2164 metric tonnes (w/w). DNA sequences identified biomass from all locations as *Ulva rigida*, with the exception of New Quay, which was *Ulva rotundata*. Some blooms contained significant amounts of As, Cu, Cr, Pb and Sn. The results showed that all metal concentrations had a negative relationship (except Se) with the Ecological Quality Ratio (EQR). However, only in the case of Mn were these differences significant ( $p = 0.038$ ). Overall, the metal composition and concentrations found in *Ulva* were site dependent, and not clearly related to the ES. Nevertheless, sites with a moderate or poor ES had a higher variability in the metals levels than in estuaries with a high ES.

## Introduction

Anthropogenic activities occurring in the coastal areas can produce an array of stressors on the local biological communities. These pressures can change the aquatic conditions producing different forms of pollution (e.g. dystrophy caused by an excess of eutrophication, acidification, metal toxicity, biological invasions, and pollution by organic compounds and organic matter) that degrade the environment. This environmental degradation is particularly significant in the coastal zone, where human activities have been historically concentrated [1]. The

National Development Plan 2007-2013; Sea-MAT Environmental Protection Agency. The funders had no role in study design, data collection and analysis, decision to publish, or preparation of the manuscript.

**Competing Interests:** The authors have declared that no competing interests exist.

Atlantic coast of Europe and the Mediterranean basin have been inhabited for millennia, and consequently alteration of environmental conditions and anthropogenic pressures are typically more pronounced than in other coastal areas of the world [2]. Eutrophication has been identified as a principal pressure in European marine ecosystems, and decreasing nutrient loading to these systems has been identified as the main restoration solution [3]. The effects of this pressure can also alter irradiance levels and substrate composition and consequently reduce the composition diversity of the aquatic and benthic communities [4, 5, 6]. Past studies have shown that the anthropogenic release of potentially toxic metals into the water column can be three times the amount from natural inputs [7, 8, 9]. It has been well documented that exposure to priority pollutants (e.g. arsenic, cadmium, chromium, and lead) can be a risk to both ecosystems [9] and human health [10].

To monitor coastal pollution, environmental surveys often primarily involve the measurement of physical and chemical attributes to give a sense of water quality. However, the exclusive use of such methods can give a localised and transient measurement, and overall offers little indication of the long term effects of pollutants on the benthic ecology [11]. The use of bioindicators as an ecological monitoring tool has advantages over physico-chemical indicators. The core principle of using bioindicators is that they give a direct measure of the effect of pollution on the organisms. Bioindicators could also give an indication of pollutant effects in the benthic communities once the pollutant has disappeared from the aquatic system or when levels of contaminants are too low for accurate determination to be carried out by analytical instruments [11]. Moreover, the need to carry out measurements on the bioindicator is typically less frequent when compared to direct water sampling due to movement of water bodies (e.g. estuaries and coastal zones) and temporal variations in contaminant concentration [12]. As such, bioindicators can give comprehensive information on the effects of the pollutant on the ecosystem compared to direct measurements of the physical/chemical parameters.

The assessment of ecological health in marine system is governed by two primary pieces of legislation, the Water Framework Directive (WFD) and the Marine Strategy Framework Directive (MSFD). The WFD is based on an ecological assessment rather than a traditional physico-chemical one, to assess the degree of degradation caused by anthropogenic pressures [13]. This degradation must be assessed using different biological quality elements (BQE). One of the BQE used to assess the Ecological Status (ES) in coastal and transitional water bodies is based on the composition and abundance of the marine macroalgae. The presence of 'blooms of green opportunistic macroalgae', mainly of the genus *Ulva*, have been primarily used for assessment of transitional waters in Ireland [14, 15] and other European countries [16]. The WFD assessment of opportunistic algae can also be considered when assessing the MSFD descriptor in Eutrophication (D5) in coastal waters. However, for these investigations the sites are transitional waters so outside to scope of the MSFD. The definitions of Good status differ between the two directives, with the Water Framework Directive (WFD) aiming for at least Good Ecological status and the Marine Strategy Framework Directive (MSFD) aiming for Good Environmental status. There are differences between the directives as to how such an environmental position is defined with the WFD focusing on Biological, chemical and supporting elements to describe status and the MSFD looking at a wider range of descriptors of the entire marine ecosystem. There are also differences in the scale of the assessment. The WFD is concerned with all surface and ground water bodies in member states up to 1 nautical mile from the land. The MSFD covers the entire marine waters of member states with the inner MSFD boundary incorporating coastal waters as defined under the WFD, but does not include the transitional waters (brackish and estuarine waters). In the coastal areas the overlap between the directives the MSFD is considered where it adds new elements not covered under the WFD.

Green macroalgae of the genus *Ulva* (commonly known as ‘Sea Lettuce’; Ulvophyceae, Chlorophyta) are cosmopolitan, able to tolerate a wide range of salinities and consequently are found in freshwater, estuarine systems and on open coasts [17]. Under favourable environmental conditions, such as elevated irradiance, raised water temperature, and reduced wave action [18, 19], *Ulva* spp. can thrive to such an extent that they become an environmental problem in the form of persistent blooms. Blooms may be stimulated or prolonged by anthropogenic nutrient inputs from agriculture, aquaculture, industrial and domestic waste [20, 21, 22]. Growth and accumulation of *Ulva* may result in anoxic decomposition and release of gaseous sulphur compounds (e.g. hydrogen sulphide, carbon disulphide, methyl sulphide). Exposure to these noxious gases can lead to health risks in both humans and wildlife [23]. Environmental impacts of the development and degradation of *Ulva* blooms include impacts on local biogeochemistry and biodiversity [24]. These negative influences on the local environment and the socio-economics of the affected region are often exacerbated by the scale of algal biomass being deposited. This can be illustrated by Brittany’s annual *Ulva* blooms where during 1992, 14,560 m<sup>3</sup> of *Ulva* seaweed was removed from the shoreline at a cost of €1.8 million [24]. Similarly, the removal of over one million tonnes of green algal biomass in the Qingdao region of China during the 2008 *Ulva* blooms cost €200 million [24]. Although the economic impact can be significant, it has been suggested that managing the biomass could bring revenue to the local economy [25]. In this sense, this biomass could be used for animal feeds, fertilisers, and pharmaceuticals, among other uses [26]. However, the concentration of toxic metals could preclude these applications since it could pose a risk to human health.

Interspecific variations in growth and physiology can lead to different responses to environmental change, and differences in biomass quality for human uses (e.g. varying concentrations in ulvan, trace metals, and bioactive compounds). For instance, tubular species (which were formerly distinguished with the separate genus *Enteromorpha*) possess higher concentrations of trace elements than bladed taxa [27]. Furthermore, the presence of a combination of different species can also stimulate or prolong the intensity and duration of the bloom, since a temporal and spatial succession can occur [28]. The arrival of cryptic non-native species could explain the occurrence of macroalgal tides in places where nutrients conditions remain more or less constants [29]. For these reasons, the taxonomical clarification of the *Ulva* species that are forming green tides is key to understanding the occurrence of these blooms, and maybe to determine its possible applications. However, *Ulva* species are morphologically simple, but taxonomically complex: due to insufficiently reliable morphological characters to separate species [30, 31], a microscopic morphological identification often does not allow a definitive classification of *Ulva* species—molecular genetic information is needed to identify particular taxa, [30, 31].

The principal aims of the present study were: i) to assess the Ecological Status of different Irish transitional water bodies under different anthropogenic pressures based on the presence of ‘blooms of green opportunistic macroalgae’; ii) to establish the taxonomic identity of *Ulva* bloom-forming species; and iii) to ascertain the possible correlation between the status and metal content in the *Ulva* blooms. The study concludes with an evaluation of possible management strategies with the consideration of environmental and socio-economics implications (e.g. uses in animal feeds, pharmaceuticals, and fertilisers).

## Materials and Methods

### 2.1 Site selection

The WFD requires EU member states to have a national monitoring programme for sampling and assessment of the biological quality elements (BQE) used for assigning ES [13]. As part of

this programme, a series of water bodies are assessed for opportunistic macroalgal BQE on an annual or three-yearly basis [14]. A subset of eight Irish waterbodies representing both agricultural and urban pressures were selected for the present study (Fig 1). Water bodies were chosen in areas known to experience a dominance of bladed *Ulva* proliferations at differing scale of impact (i.e. excluding dominant tubular (enteromorphoid) bloom species, such as *Ulva compressa* L. and *U. intestinalis* L.) [32, 33, 34]. To minimise the effect of seasonal biomass variability, all samples were collected in the same month, August 2010. Specific permissions were not required for access or sampling and the species being investigated are not protected.

## 2.2 WFD assessment

The Irish WFD monitoring tool based on the abundance of opportunistic macroalgae is described by Scanlan et al. [16] and Ní Longphuirt et al. [15]. This tool considers spatial cover, biomass and persistence of algal growth to classify water bodies relative to undisturbed conditions [16]. Following WFD specification, the assessment provided by this tool is quantified into a single numerical value between 0 and 1, the Ecological Quality Ratio (EQR), which represents the ratio between the current and the reference (i.e. pristine or near-pristine) condition. Lower numbers lower ecological status (ES), so that EQR and ES are interchangeable. This consist of calculating the area of the intertidal available for growth of attached algae excluding areas such as channel edges, soft silt-banks and other areas not suitable for algal growth (Available Intertidal Habitat, AIH). This was undertaken using GIS prior to the field survey with desk-based assessments ground-truthed *in situ*. An initial assessment of the entire water body was undertaken to estimate roughly the areas of AIH affected by algal mats (the affected area, AA), and if algal cover (AA/AIH) exceeded 5% then a more detailed survey was undertaken. The outer edges of the patches of algae were mapped *in situ* using GPS. Multiple transects were taken through each patch depending on the overall size of the patch. A minimum of 1 and up to 4 transects were taken in each patch with a 500m separation between them. A minimum of 10 quadrats (0.25 m<sup>2</sup>) were placed haphazardly along each transect. The percentage cover and algal biomass in each quadrat was recorded. Cover was estimated by counting the number of squares in a 5x5 gridded quadrats filled with algae. Percentage cover was estimated in the field. Photographs of each quadrat were also taken for quality control checks in the lab after the survey. The presence of algae entrained into the sediment in each quadrat was recorded and total biomass was calculated by multiplying spatial cover by mean biomass. Assessments of cover and biomass were undertaken *in situ* at low water. The data were compiled into five sub-metrics to provide a WFD assessment for the water body and compared to the boundaries in Table 1.

1. Total percentage cover of the available intertidal area;
2. The lower of Total patch size of the affected area (AA), or the affected area (ha) as a percentage of the total available intertidal habitat (ha) (AA/AIH%);
3. Average biomass of algae on the available intertidal area;
4. Average biomass in affected area;
5. Percentage of quadrats with algae entrained into sediment.

Each sub-metric was scored with an EQR from 0–1 calculated as follows:

$$EQR = upper\ EQR\ range - \left\{ \left( \frac{value - lower\ class\ range}{class\ width} \right) \times EQR\ band\ width \right\}$$

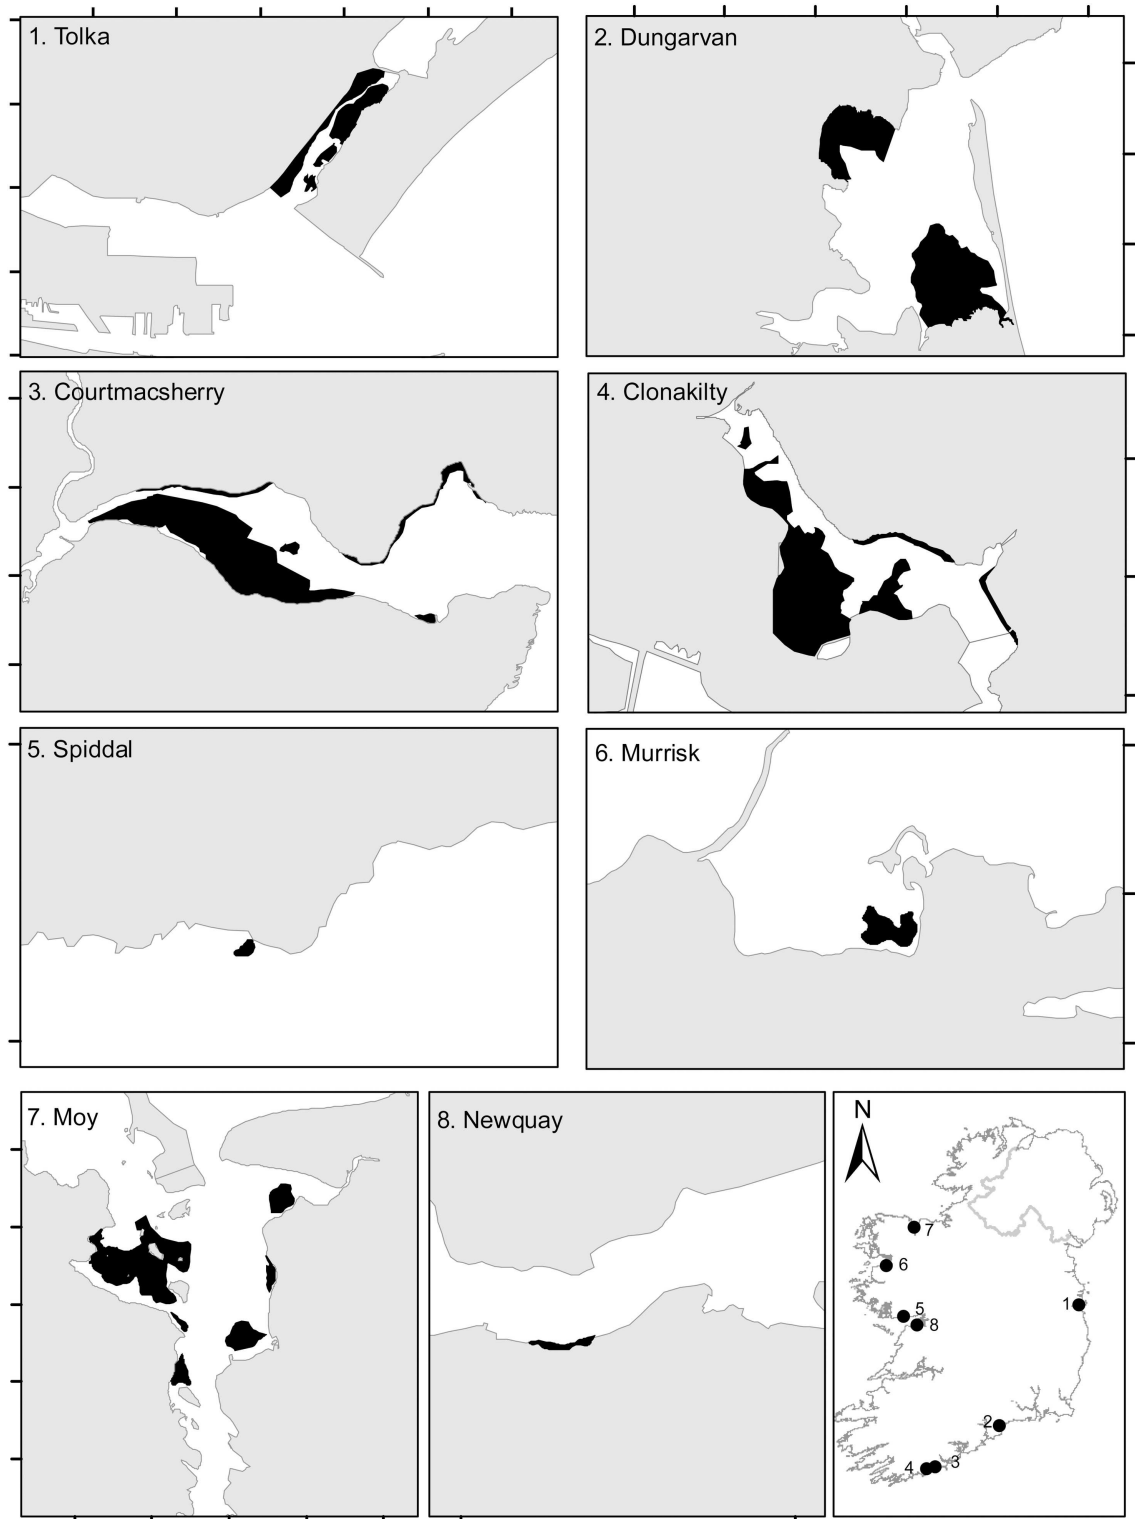

**Fig 1. The location of Irish *Ulva* bloom sampling sites.** Darkened areas on the map show the location of *Ulva* populations forming blooms. Tick marks on border are at 1km intervals.

doi:10.1371/journal.pone.0169049.g001

**Table 1. Boundary conditions for each of the algal bloom assessment sub metrics for calculated ecological status categories.**

| Quality status | %cover AIH | Biomass (g m <sup>2</sup> ) AIH | Biomass (g m <sup>2</sup> ) AA | %entrained AA | AA (ha)* | AA/AIH (%)* | EQR        |
|----------------|------------|---------------------------------|--------------------------------|---------------|----------|-------------|------------|
| Lower limit    | 0          | 0                               | 0                              | 0             | 0        | 0           | <b>1.0</b> |
| High/Good      | 5          | 100                             | 100                            | 1             | 10       | 5           | <b>0.8</b> |
| Good/Moderate  | 15         | 500                             | 500                            | 5             | 50       | 15          | <b>0.6</b> |
| Moderate/Poor  | 25         | 1000                            | 1000                           | 20            | 100      | 50          | <b>0.4</b> |
| Poor/Bad       | 75         | 3000                            | 3000                           | 50            | 250      | 75          | <b>0.2</b> |
| Upper limit    | 100        | 6000                            | 6000                           | 100           | 6000     | 100         | <b>0.0</b> |

AA, affected area; AIH, available intertidal habitat.

\*Only the lower of the two asterisked criteria is used in calculating the final overall water body Ecological Quality Ratio (EQR). EQR is synonymous with ecological status or ES. Adapted from Scanlan et al. [16].

doi:10.1371/journal.pone.0169049.t001

For example, if site  $\chi$  % cover of 20 lies between 15–25, so

$$\text{Upper EQR range} = 0.6,$$

$$\text{Lower class range} = 15,$$

$$\text{Class width} = 25 - 15 = 10,$$

$$\text{EQR band width} = 0.2$$

$$\text{EQR} = 0.6 - \left\{ \left( \frac{20 - 15}{10} \right) \times 0.2 \right\} = 0.5$$

The final Ecological Quality Ratio (EQR) was calculated as the average of all the sub-metrics.

The WFD tool is used to classify water into five Ecological Status categories (ESC: Bad, Poor, Moderate, Good and High) with boundary levels set on the basis of expert judgement and intercalibration exercises.

### 2.3 Sample collection

Materials for elemental analysis were collected from twenty 0.25m<sup>2</sup> quadrats in each site, haphazardly placed across the algal patches. Three entire thalli without epiphytic attachments or signs of herbivory were collected within each quadrat. *Ulva* plants were individually placed into clean polythene bags, and stored in a cool box for transport to the laboratory. Samples were washed with Milli-Q water [18.3 MΩ·cm, Millipore, Bedford, USA] to remove debris and any adhering particulate material and then freeze-dried at -52°C [FreeZone 12, Labconco, Missouri, USA].

### 2.4 Molecular analyses

DNA was extracted from the freeze-dried material used for the metal analyses. Since this material consisted of mixed, small flakes, the extracted subsamples (10–20 mg) may potentially have belonged to more than one specimen. The extraction with a commercial kit [NucleoSpin<sup>®</sup> Plant II, Macherey-Nagel, Düren, Germany] followed the manufacturer’s instructions. The large subunit of the plastid-encoded Ribulose Bisphosphate Carboxylase-Oxygenase (RuBisCO) gene region (*rbcl*) was amplified in a polymerase chain reaction (PCR) using



published primers SHF1 and SHR4 [31] at an annealing temperature of 55°C. In all other aspects, amplification, purification of PCR products and sequencing followed methods given in Heesch et al. [35].

To confirm the taxonomic identity of the "Certified Reference Material (CRM) for analytical quality assurance of 'Ulva lactuca' BCR-279" [European Joint Research Centre; Institute for Reference Materials and Measurements—IRMM, Geel, Belgium], a small scoop of the powdered material (~10 mg) was subjected to the same methods. Since the DNA of the CRM showed signs of degradation, its *rbcL* region was amplified and sequenced in two parts, using an internal primer pair developed for ancient *Ulva* samples (C. Maggs, personal communication). Care was taken not to contaminate the CRM by performing all procedures separately from field-sampled *Ulva*.

The resulting nine sequences were included in an alignment containing 46 published sequences, 42 representatives of the genus *Ulva* and four of the related genus *Umbraulva*, which served as outgroup (see Fig 2 for GenBank accession numbers and references). Sequence alignment and phylogenetic analysis under the Maximum Likelihood (ML) criterion followed Heesch et al. [35].

## 2.5 Sample acid digestion and metal measurement

Twenty pooled samples per sampling location (~200 mg of the three samples per quadrat) were digested in 1 mL 30% H<sub>2</sub>O<sub>2</sub> [TraceSelect<sup>®</sup> Ultra, Sigma-Aldrich, St. Louis, USA] and 5 mL 65% HNO<sub>3</sub> [trace metal free grade, Fisher Scientific, Loughborough, UK] using microwave digestion [Multiwave 3000, Anton Paar, Graz, Austria]. The *Ulva lactuca* CRM [BCR-279] was used for quality assurance. There was a good match between the reported values for the CRM and the metal concentrations found in the current study (Table 2). Elemental (Al, As, Ba, Cd, Co, Cr, Cu, Mn, Mo, Ni, Se, Sr, Sn, Pb, Ti, V, and Zn) determination was performed using an Elan DRC-e Inductively Coupled Plasma—Mass Spectrometry, ICP-MS, [Perkin-Elmer, USA] [36].

## 2.6 Statistical analysis

Statistical analyses were performed using PERMANOVA+ PRIMER 6 [Plymouth Routines in Multivariate Ecological Research], and SPSS software [V17, SPSS, IBM, Corporation, USA]. In all statistical analyses, significance was set at  $p$ -value <0.05, with randomizations based on 9999 permutations.

To assess differences in metal concentrations and composition between the different Ecological Status categories, a two-way Permutational Analysis of Variance (PERMANOVA) was carried out with ESC as a fixed factor, and Site as a random factor nested in ESC. In the case of metal composition, the dataset was initially normalised. All analyses were based on Euclidean Distance. Additionally, a distance-based test for homogeneity of multivariate dispersion (PERMDISP [37]), and a Principal Component Analysis (PCA) was performed to interpret and visualise the multivariate analysis of metal composition. Furthermore, Pearson's correlations were used to quantify the associations between metals. To ascertain whether levels of metals found in seaweed were related to ecological quality ratios, Spearman's correlation were used. Where correlation coefficients were averaged to summarize patterns, values were first z-transformed to reduce this bias in estimated means and confidence intervals [38]. Where PERMANOVA indicated significant differences among levels, these were explored (for a subset of potential toxic metals: V, Cr, Ni, Cu, As, Cd, Sn, and Pb) using univariate ANOVA.

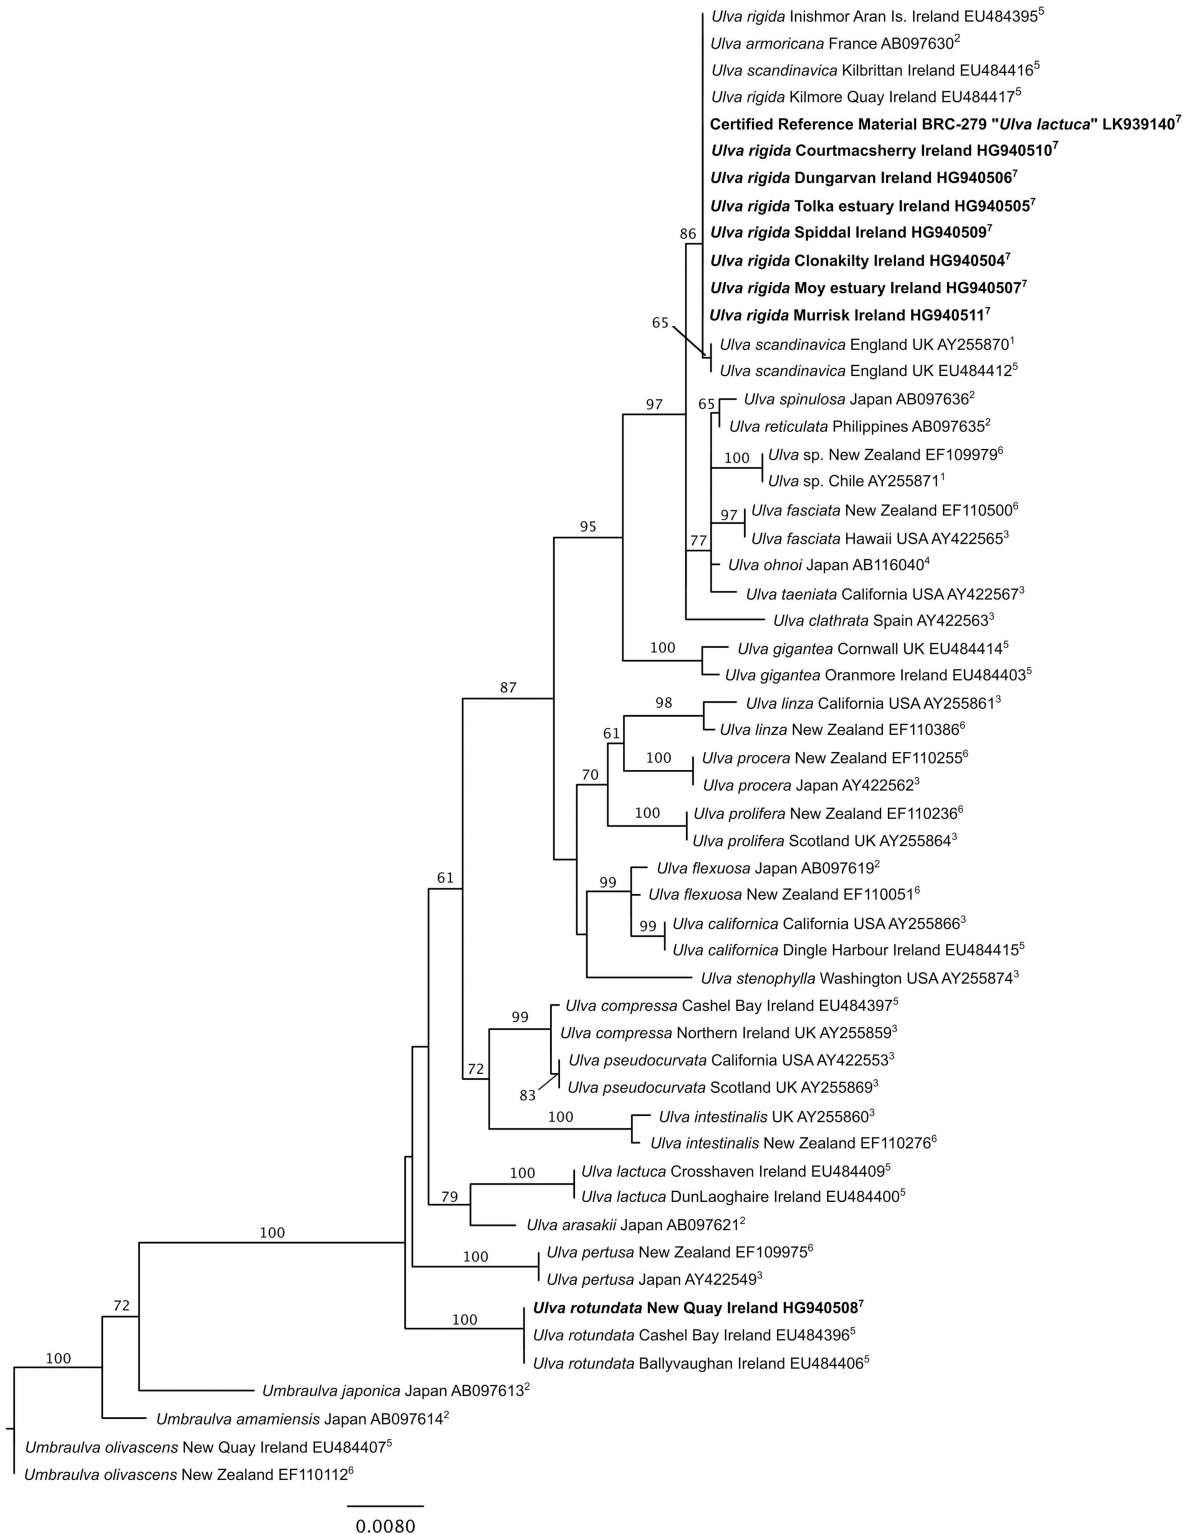

**Fig 2. Phylogenetic tree inferred from a Maximum Likelihood analysis of partial *rbcL* sequences of *Ulva* species.** Numbers above lines indicate bootstrap support values (branches without number received 50% support or less). Species names are followed by information on the sampling location, the GenBank/ENA accession number and the respective publication: <sup>1</sup>: Hayden et al. [40]; <sup>2</sup>: Shimada et al., [41]; <sup>3</sup>: Hayden & Waaland [42]; <sup>4</sup>: Hiraoka et al. [43]; <sup>5</sup>: Loughnane et al. [39]; <sup>6</sup>: Heesch et al. [31]; <sup>7</sup>: present study, set in bold.

doi:10.1371/journal.pone.0169049.g002



**Table 2. Observed results of the metal determination in certified reference material (CRM)-*Ulva lactuca* [BCR-279] found in the present study (mg kg<sup>-1</sup>, dry weight).**

|                          | Reported <sup>1</sup> | Found          |
|--------------------------|-----------------------|----------------|
| <i>Certified values</i>  |                       |                |
| As                       | 3.09±0.21             | 3.24±0.19      |
| Cd                       | 0.27±0.02             | 0.24±0.02      |
| Cu                       | 13.10±0.40            | 12.38±0.79     |
| Pb                       | 13.50±0.40            | 13.17±5.10     |
| Se                       | 5.90±0.40             | 5.14±1.79      |
| Zn                       | 51.30±1.20            | 51.86±9.49     |
| <i>Indicative values</i> |                       |                |
| Cr                       | 10.73±0.70            | 9.61±0.80      |
| Mn                       | 2090.00±50.00         | 2245.07±270.93 |
| Ni                       | 15.90±0.40            | 13.90±1.83     |

<sup>1</sup>Reported values were derived from *Ulva lactuca* CRM no 279 BCR reference material report.

doi:10.1371/journal.pone.0169049.t002

## Results

### 3.1 Site assessment

Three sites were classified as high Ecological Status (Spiddal, Murrisk, and New Quay), three as moderate (Tolka, Dungarvan, and Moy) and two as poor (Clonakilty and Courthmacsherry). At the three localities of high status, the *Ulva* cover of the intertidal area was lower than 5%, and no biomass estimation was made at these sites. Full surveys were undertaken for the other five locations. The EQR score of these five locations ranged between 0.57 in Tolka and 0.38 in Courthmacsherry (Table 3). The survey revealed that the two sites categorised as ‘Poor’, with the lowest EQR scores in this study, i.e. Courtmacsherry and Clonakilty, had the largest algal blooms, with an estimated biomass of 2164 and 845 metric tonnes, respectively.

### 3.2 Molecular genetic identification

The nine *rbcL* sequences produced in this study were between 1082 (sample from Tolka) and 1197 (*Ulva* CRM) bases long. Sequence comparisons showed that seven of the Irish *Ulva* blooms included in this study contained *U. rigida*, while the New Quay bloom comprised *U.*

**Table 3. Details of *Ulva* bloom sites and the designation of water quality in the study sites and estimated land use.**

| No | Site            | Lat      | Long     | WFD      | EQR  | Spatial Cover (ha) | Mean Biomass (g m <sup>2</sup> ) | Total Biomass (tonnes) |
|----|-----------------|----------|----------|----------|------|--------------------|----------------------------------|------------------------|
| 1  | Tolka           | -6.17233 | 53.36048 | Moderate | 0.57 | 40.63              | 1329.53                          | 540.19                 |
| 2  | Dungarvan       | -7.62002 | 52.07497 | Moderate | 0.54 | 108.71             | 302.50                           | 328.85                 |
| 3  | Courthmacsherry | -8.72488 | 51.63683 | Poor     | 0.38 | 128.78             | 1680.51                          | 2164.16                |
| 4  | Clonakilty      | -8.86716 | 51.60880 | Poor     | 0.38 | 76.12              | 1110.42                          | 845.25                 |
| 5  | Spiddal         | -9.31508 | 53.23941 | High     | 1    | <1                 | N/A                              | N/A                    |
| 6  | Murrisk*        | -9.64144 | 53.78255 | High     | 0.93 | 28.57              | N/A                              | N/A                    |
| 7  | Moy             | -9.15267 | 54.19604 | Moderate | 0.47 | 98.99              | 402.00                           | 397.94                 |
| 8  | New Quay        | -9.07403 | 53.15596 | High     | 1    | <1                 | N/A                              | N/A                    |

WFD-Water Framework Directive status for algal biomass monitoring tool [16]. Five potential quality categories are used: ‘High’, ‘Good’, ‘Moderate’, ‘Poor’, and ‘Bad’. EQR- Ecological Quality Ratio- scale from 1–0, high is 1, and bad is 0 [15]. Spatial cover- Total area covered by algae, mapped in situ.

\*Biomass was not assessed here as coverage was below WFD criteria for biomass assessment

doi:10.1371/journal.pone.0169049.t003

*rotundata* Bliding: the *rbcl* sequence from this site was identical to two other samples from sites in Galway Bay, Ireland identified as *U. rotundata* by Loughnane et al. [39], forming a 100% supported clade at the base of the *Ulva* ingroup in the phylogenetic tree (Fig 2). The *rbcl* sequences from all other blooms were identical or almost identical (a lower quality of the sequence from Tolka resulted in some unidentified bases, of which only two were in informative positions (thus equaling a potential 0.2% sequence divergence), while the others were in positions conservative to all *Ulva* species included in the alignment). These seven sequences comprised a well-supported (82%) clade at the top of the phylogenetic tree (Fig 2), together with GenBank sequences identified as *U. rigida*, *U. scandinavica* Bliding and *U. armoricana* P. Dion, B.de Reviere & G. Coat. The *U. rigida* clade also contained the sequence of the CRM, thus making the reference material a direct match for seven of the eight Irish *Ulva* bloom samples.

### 3.3 Metals concentrations

*Ulva* metal concentrations are presented in Table 4 (Al, Ti, Mn, Co, Zn, Se, Sr, Mo & Ba) and potentially toxic metals in Fig 3 (V, Cr, Ni, Cu, As, Cd, Sn & Pb). PERMANOVA results for all metals showed that *Ulva* tissue concentrations differed significantly between different sites (*P*-values < 0.01, Table 5), but no significant effect in metal concentration was observed for ESC. *Ulva* from Dungarvan generally had the greatest metals concentrations in any site. While across all sites, Al occurred in highest quantities. *Ulva* from Dungarvan and Tolka contained significantly higher amounts of Al in comparison to other sites (*P*<0.001). The variability in Al contents between sites was also high, ranging from 23.45 ± 6.18 mg kg<sup>-1</sup> in Spiddal to 1591.43 ± 294.72 mg kg<sup>-1</sup> in Dungarvan.

*Ulva* collected from Courtmacsherry and Clonakilty had relatively low amounts of Cr, Pb, Sn, Se, and Zn, when compared to Tolka or Dungarvan blooms. By contrast, the levels of Cu, Cd, Mn and Sr were significantly (*P*<0.001) higher at Courtmacsherry and Clonakilty than at many of the sites, including Tolka and Dungarvan. The bloom in Moy had the highest recorded cadmium concentration (*P*<0.001, Fig 3F).

Spearman correlation coefficients between *Ulva* metal concentrations and site EQR were negative on average (Table 6, mean -0.43, CI -0.3272 to -0.5233). This implies a higher metal concentration at low EQR. However, there was variation between metals, with Se and Ag having correlations close to zero. Only Mn had a significant negative correlation with EQR (-0.735, *P* = 0.038). The evidence for generalizing patterns of metal concentration across EQR values is therefore weak and there was no evidence that potentially toxic metals were more or less strongly associated with EQR (*F*<sub>1,19</sub> = 0.26, *p* > 0.05).

**Table 4. Metal content found in Irish *Ulva* blooms (mean ± SE, *n* = 20, mg kg<sup>-1</sup>, dry weight).**

|           | Sites          |                |                |              |            |              |              |             |
|-----------|----------------|----------------|----------------|--------------|------------|--------------|--------------|-------------|
|           | Tolka          | Dungarvan      | Courtmacsherry | Clonakilty   | Spiddal    | Murrisk      | Moy          | New Quay    |
| <b>Al</b> | 1081.55±116.80 | 1591.43±294.72 | 548.75±86.33   | 509.79±96.50 | 23.45±6.18 | 336.81±57.24 | 234.93±47.29 | 90.58±21.54 |
| <b>Ti</b> | 23.52±1.90     | 25.29±3.71     | 13.11±1.09     | 18.38±2.27   | 7.62±0.35  | 13.09±1.49   | 14.48±1.53   | 9.08±0.42   |
| <b>Mn</b> | 128.56±30.82   | 131.56±24.73   | 212.06±57.64   | 144.57±49.87 | 25.58±4.28 | 125.95±25.50 | 20.71±2.26   | 15.81±2.29  |
| <b>Co</b> | 0.85±0.05      | 0.78±0.07      | 0.66±0.06      | 0.72±0.09    | 0.14±0.01  | 0.57±0.04    | 0.31±0.02    | 0.09±0.01   |
| <b>Zn</b> | 31.71±1.71     | 31.38±3.11     | 17.21±1.18     | 24.70±1.61   | 10.84±0.31 | 26.45±2.40   | 17.68±1.37   | 12.59±0.34  |
| <b>Se</b> | 2.67±0.24      | 2.94±0.26      | 2.92±0.29      | 3.05±0.43    | 5.53±0.57  | 4.04±0.40    | 3.93±0.50    | 2.51±0.23   |
| <b>Sr</b> | 71.19±4.34     | 97.33±7.86     | 91.72±4.85     | 114.70±5.09  | 90.93±2.73 | 94.45±2.95   | 78.00±4.59   | 73.99±4.63  |
| <b>Mo</b> | 0.22±0.02      | 0.13±0.01      | 0.10±0.01      | 0.14±0.02    | 0.11±0.01  | 0.10±0.01    | 0.07±0.01    | 0.09±0.01   |
| <b>Ba</b> | 5.83±0.54      | 5.98±1.08      | 3.22±0.34      | 6.51±0.79    | 0.30±0.04  | 4.24±0.46    | 3.72±0.27    | 1.59±0.39   |

doi:10.1371/journal.pone.0169049.t004

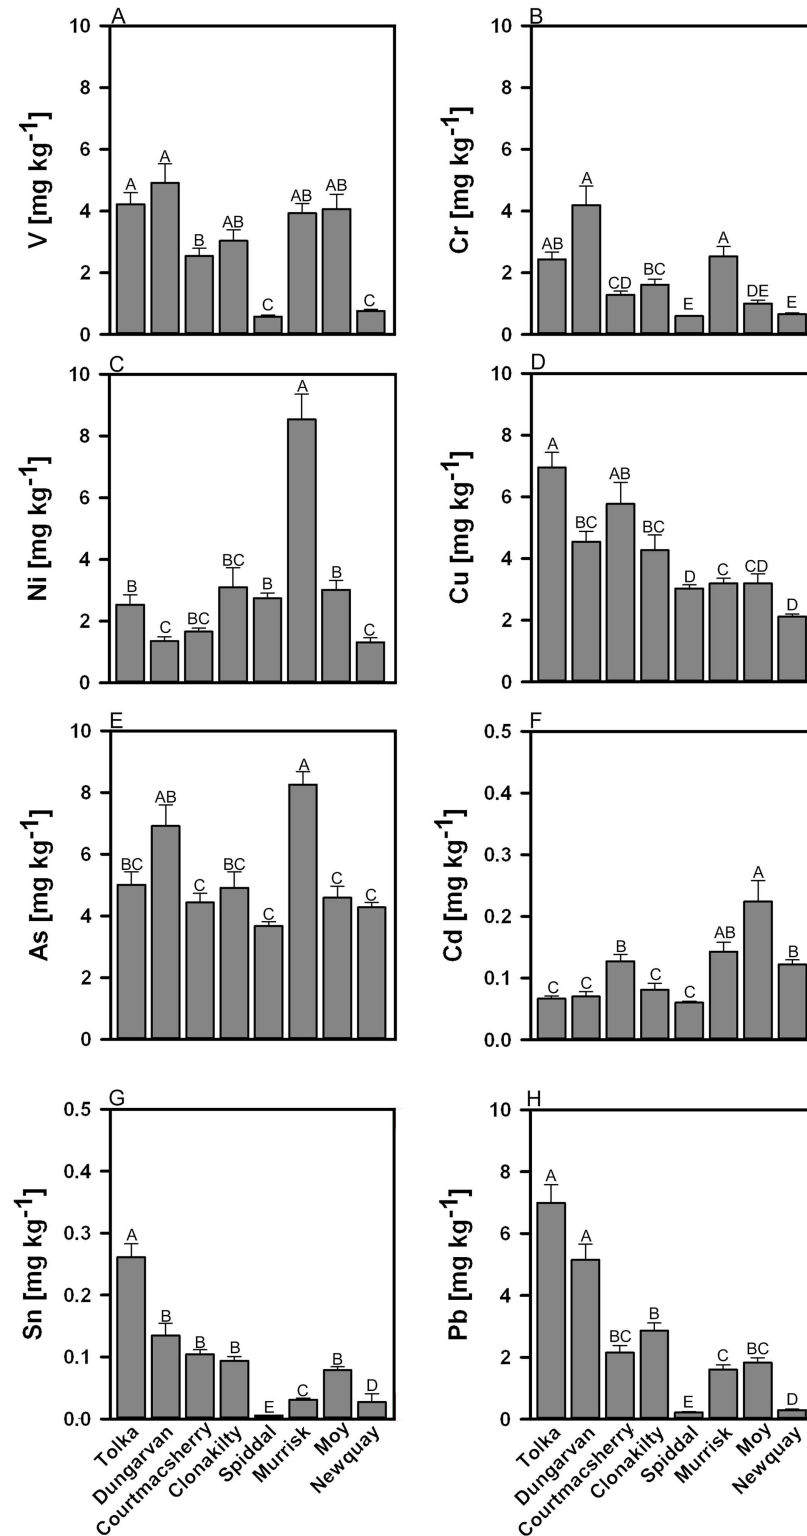

**Fig 3. Mean concentrations of potentially toxic metals. (A) V, (B) Cr, (C) Ni, (D) Cu, (E) As, (F) Cd, (G) Sn and (H) Pb in *Ulva* blooms at the different sampling sites.  $\pm$  S.E. Different superscript represents statistical significant differences ( $P < 0.05$ ).**

doi:10.1371/journal.pone.0169049.g003

**Table 5. Permutational multivariate analysis of variance on the differences between ecological status and metal composition.**

| PERMANOVA         | df       | MS                    | Ps-F            | p (MC)  |
|-------------------|----------|-----------------------|-----------------|---------|
| Ecological Status | 2        | 9.27 x10 <sup>6</sup> | 2.5433          | 0.1412  |
| Site              | 5        | 3.65 x10 <sup>6</sup> | 10.777          | <0.0001 |
| Residual          | 144      | 3.38 x10 <sup>5</sup> |                 |         |
| PERMDis           | p-value  | Ecological Status     | Mean Dispersion |         |
| High-Moderate     | <0.0001* | High                  | 170.81±19.90    |         |
| High-Poor         | 0.0003*  | Moderate              | 720.15±90.83    |         |
| Moderate-Poor     | 0.021*   | Poor                  | 392.65±40.48    |         |

\* indicates value has statistical significance ( $P<0.05$ ), ± S.E.

doi:10.1371/journal.pone.0169049.t005

### 3.4 Metal composition

Metal concentrations relative to each other were not consistent across sites. Permutational dispersion analyses also showed differences in data dispersion between the ESC ( $P<0.05$ ) (Table 5). The level of dispersion was greatest in the 'Moderate' category, while 'High' status had the lowest.

A principal component analysis (PCA) was conducted based on the metal levels from the eight sites (Fig 4). Over 66.9% of the variation between samples could be explained by the two

**Table 6. Spearman's correlation coefficient showing the relationship between metal concentration and ecological quality ratio (EQR).**

| Metal      | EQR            |
|------------|----------------|
| Al         | -0.554         |
| Ti         | -0.590         |
| V          | -0.337         |
| Cr         | -0.313         |
| Mn         | <b>-0.735*</b> |
| Ni         | -0.193         |
| Co         | -0.530         |
| Cu         | -0.590         |
| Zn         | -0.277         |
| As         | -0.229         |
| Se         | 0.084          |
| Sr         | -0.470         |
| Mo         | -0.193         |
| Ag         | -0.036         |
| Cd         | -0.327         |
| Sn         | -0.602         |
| Sb         | -0.627         |
| Ba         | -0.554         |
| Tl         | -0.313         |
| Pb         | -0.602         |
| Bi         | -0.602         |
| <b>MCI</b> | -0.530         |

MCI, Metal Content Index is calculated as the geometric mean of all metals concentrations.

\* indicates correlation value has statistical significance ( $P<0.05$ ).

doi:10.1371/journal.pone.0169049.t006

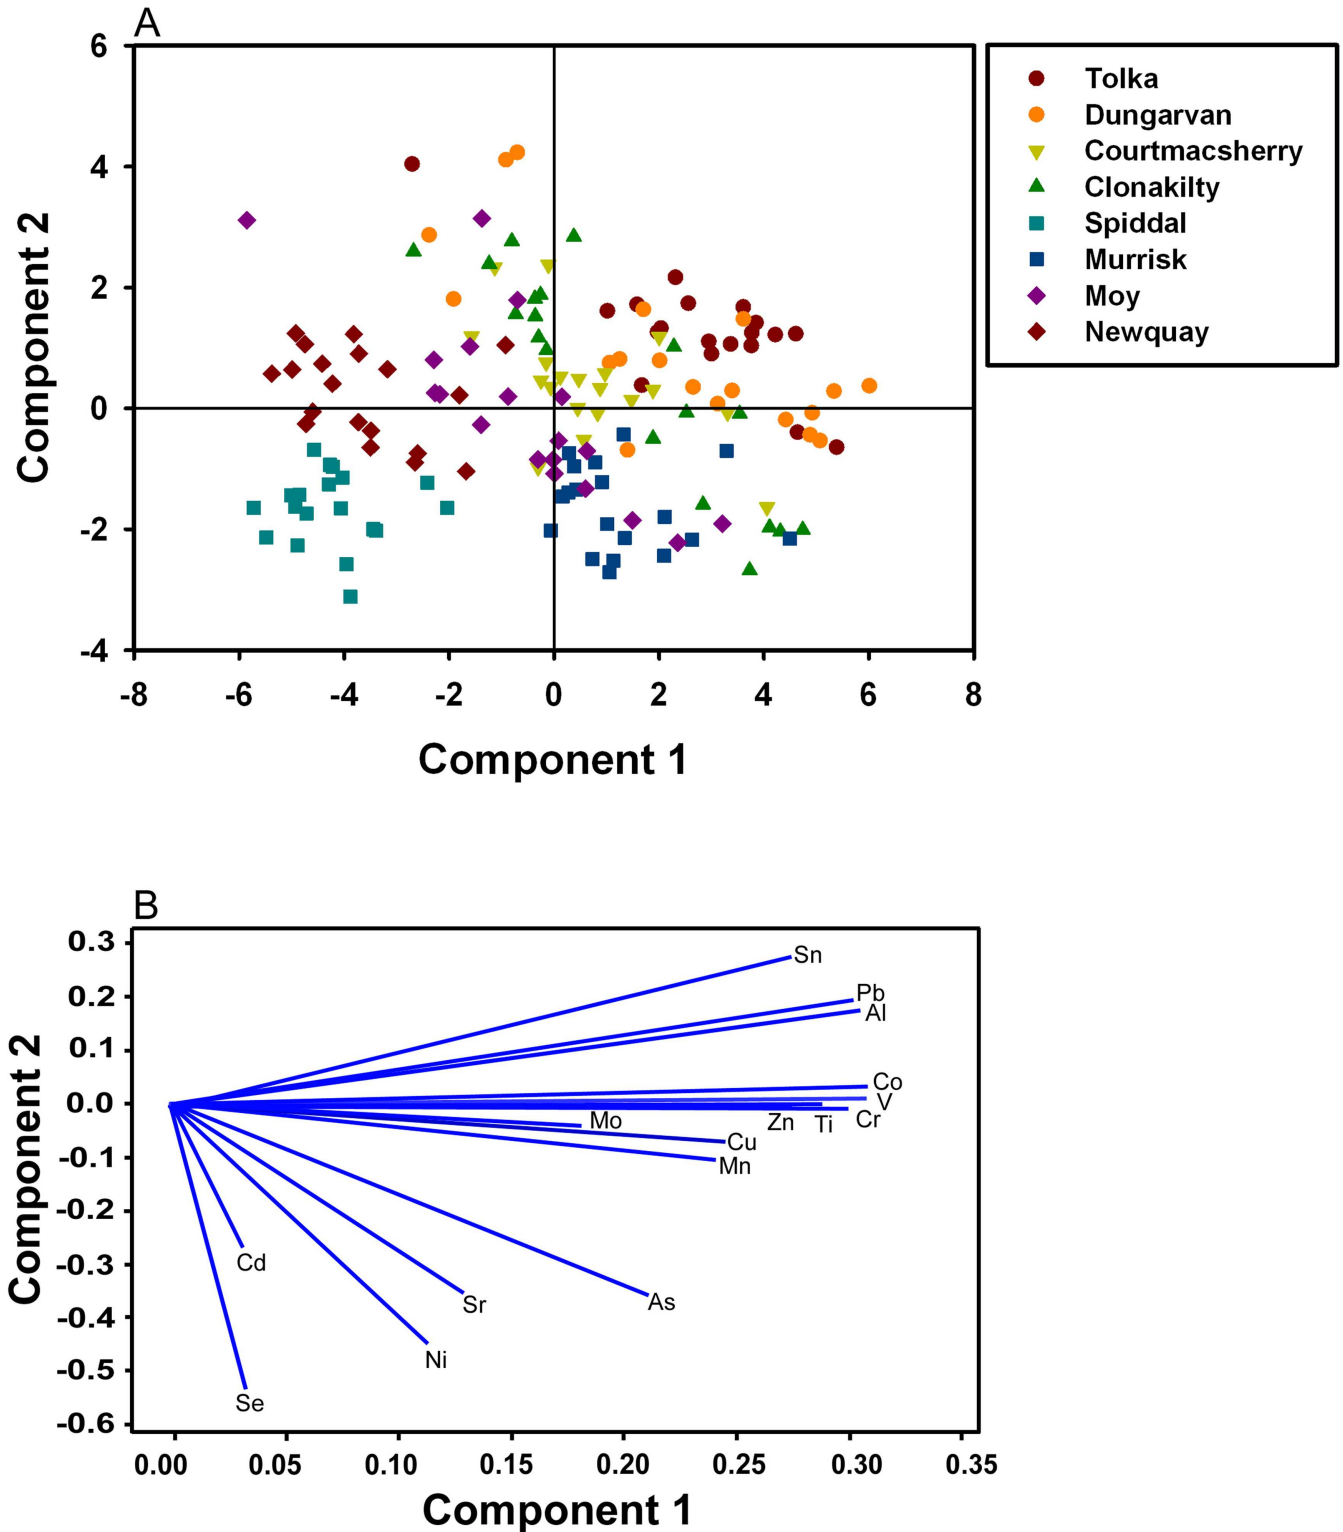

**Fig 4. Principle component analysis.** (a) Score biplot of the first and second principal component for metal concentration and sampled sites. (b) Loading plot of first and second principal component of the relationship between metals within all the sites. Component 1 and 2 explains 66.9% of the sample variation.

doi:10.1371/journal.pone.0169049.g004

principal components. The score plot showed that metal values found in Spiddal *Ulva* were closely clustered together (Fig 4A) due to lower metal concentrations. A similar clustering effect was observed at other sites including Murrisk, Courtmacsherry and Tolka; however, discrete groupings were less discernible due to overlapping score values with other sites. Weak clustering was found in the plotted scores for Clonakilty, Moy and Dungarvan, where high variations within each site's score values led to a wider scattering over the score plot. The loading plot for all measured metals (Fig 4B) indicated that Se, Cd, Ni, Sr, and As did not correlate strongly with other metals (Pearson's correlations,  $r < 0.635$ ). In contrast, metals such as Al, Ti, Cr, V, Co, Sn, Ba and Pb generally correlated with one another (Pearson's correlations,  $p < 0.001$ ,  $r > 0.821$ ). Furthermore, the plot highlighted two metals (Al, Sn) that were relatively closely associated with Pb (Pearson's correlation,  $p < 0.01$ ,  $r = 0.871$ , and  $r = 0.901$ , respectively).

## Discussion

### 4.1 Algal bloom characteristics

One of the earliest reports of green algal blooms in Ireland was from Belfast Lough [44], and over the decades more occurrences were documented from other parts of the Irish coastline, including Dublin Bay [32], and Rogerstown Estuary [33]. More recently, blooms observed at Courtmacsherry and Clonakilty have been reported to have increased in severity [34]. In the present study, Courtmacsherry and Clonakilty had the largest algal blooms. In comparison to other blooms found in other parts of the world, the scale of the biomass produced in Ireland is dwarfed by both Brittany (France [24]) and Qingdao (China [25]).

These severe blooms may be linked to eutrophic conditions caused by nutrient loading from the surrounding catchments, with, for example, nitrate ranging between 9.170 and 26.50 mg L<sup>-1</sup>, respectively [45, 46, 47]. The high nitrogen loading has been implied by the highest stocking rate of dairy farms in Ireland [46] and this has been considered the main nutrient factor for affecting the *Ulva* bloom [15]. Similarly, nutrient enrichment linked to pig-farming was implicated in the *Ulva* blooms in Brittany [48], producing over 100,000 m<sup>3</sup> of algae annually [24]. On the other hand, the presence of consistently high phosphorous concentrations (>0.056 mg L<sup>-1</sup>) throughout the year could be responsible for a substantial *Ulva* bloom in Tolka [45].

### 4.2 *Ulva* species composition

Previous studies have shown that *Ulva* blooms can be composed of one or several species [37, 49, 25, 28]. The presence of a greater number of bloom-forming species can favour the occurrence of blooms, prolong the duration, and intensity, since different species have different environmental requirements, leading to a temporal and spatial succession [28]. In this sense, the arrival of cryptic non-native species have been invoked to explain the occurrence of macroalgal tides in places where nutrients conditions remain constants or even improved, and macroalgal tides were not observed previously [29]. The molecular analyses suggest that the majority of the sampled blooms (seven out of eight) would be composed of *Ulva rigida* irrespective of the quantity of the biomass present. This suggested that the development of the blooms could not be attributed to interspecific differences in growth or ecophysiology between different *Ulva* species, but are more likely explained by environmental conditions, supporting the occurrence of *Ulva* as an indicator of water quality regardless of species affiliation. Nevertheless, the possibility that at some sites more than one species was present should not be discounted since only a specimen per locality was identified using molecular techniques.



The mislabelling of the *Ulva* CRM as "*Ulva lactuca*" by the provider [50], which was genetically identified in this study as *U. rigida*, highlights the importance of correct, preferably genetic, identification of any studied organisms including certified reference materials. In the present study, the misidentification of the CRM was inconsequential, as it comprised the same species as most of the studied blooms. However, errors from misidentifications of reference material could become problematic where studies confound species-specific variation with other factors.

### 4.3 Metal concentrations

The presence of elevated levels of macronutrients (e.g. nitrogen and phosphorus) in the water can often enhance metal accumulation in *Ulva*; laboratory experiments by Lee and Wang [51] showed enhanced uptake of cadmium in *Ulva fasciata* Delile when exposed to elevated nitrate, and greater accumulation of chromium with increased phosphate concentration. Enhanced elemental uptake is consistent with the nutrient-rich estuaries of Clonakilty and Courtmacsherry [46] where *Ulva* showed elevated metal concentrations in the present study. The lower levels of metals in *Ulva* at Spiddal may conversely reflect relatively low macronutrient input and trace element availability in the surrounding environment [46]. *Ulva* samples from the Tolka Estuary (Dublin), which typically receives industrial and domestic effluent from the surrounding urban environment [52, 53], had some of the highest levels of priority metal pollutants (Cu, Sn & Pb, Fig 4).

Relationships with anthropogenic input and metal content do not, however, explain all the patterns: *Ulva* samples from Dungarvan Bay had relatively high concentrations of potentially toxic trace elements (V, As, Cu, Cr & Pb), despite Dungarvan having less urban influences and lower estuarine nutrient levels [46]. A leather tannery operated at one time in this area, and the estuary had historically received effluents including metal salts such as chromium used in the tanning process [54]. It is possible that the detection of elevated metals in the algal bloom could be a response to these historic activities potentially due to metals accumulated in the sediment (Fig 3).

Murrisk also had significant amounts of cadmium compared to sites that receive more anthropogenic inputs. However, the high levels of cadmium measured at these sites may be geogenic in origin, with background release in the surrounding environment through weathering and erosion of bedrock [55]. This could also explain the significantly higher amounts of arsenic observed in *Ulva rigida* from Murrisk (Fig 3E) associated with the natural weathering of arsenopyrite in the quartz veins in the surrounding mountainous region [56, 57]. This can lead to elevated arsenic concentrations in the water that flows into the nearby embayment (Clew Bay [58]). This was similarly demonstrated by arsenic levels in *Ulva rigida* collected from the Gulf of Thessaloniki, NE Greece, where measured values correlated with those found in the sediment samples [59] highlighting the potential influence of local geogenic sources on concentrations of metal in *Ulva*.

Levels of metals in *Ulva* measured in the present study were comparable to those found in *Ulva* blooms associated with the Moroccan phosphate mining region [60]. On the other hand, the metal concentrations (Al, Cr, Mn, Co, Ni, Cu, Zn, Cd & Pb) in the Irish *Ulva* tended to be at the lower limits of those reported in *Ulva* from the Venice Lagoon [61]. In contrast, *U. rigida* collected near industrial and sewage outflows (Turkey [62]) had lower amounts of copper, zinc and cadmium, when compared to the current study.

### 4.4 Relationship between ecological status assessment and metals

The work conducted in the present study revealed that there was a generalised negative trend (20 out of 21 metals) between ES and metal composition; however, most of these correlations

were not significant. The indices developed in the context of the WFD have focused on the assessment of eutrophication effects at the community level, since this pressure was identified as the most important threat for European aquatic ecosystems [16]. Although high nutrient and metal concentrations are frequently correlated due to their anthropogenic origin [63], there is not a causative relationship between these pollutants. The origin of anthropogenic sources of contamination (agricultural or industrial) in a specific area strongly influences the nutrient/metal ratio and the elemental composition of inputs. While some activities such as agriculture will produce effluent with a high nutrient/metal ratio, industrial activities are expected to produce effluents with a lower nutrient/metal ratio with a very specific metal signature depending on the activity [64]. Moreover, the variability due to anthropogenic activities must be considered alongside the variability associated with natural geogenic sources, e.g. in the metal composition in *Ulva* in Murrisk. While the PERMANOVA results based on metal concentrations and composition failed to reveal a relationship with ESC, the PERMDISP analysis and the PCA indicated that sites with moderate and poor ESC had a higher dispersion in metallic composition in comparison to sites classified as high ESC. This suggested that data dispersion for tissue metal content of *Ulva* may be an indication of this anthropogenic pressure. Nonetheless, a relationship between ES and metal contamination could not be fully established in the present study. However, the determination of *Ulva* metal concentrations provided additional useful information on the status of marine communities, which is important for a wider understanding of the anthropogenic pressures in the coastal environment. Furthermore, this information is essential, if the *Ulva* biomass is considered for commercial exploitation.

#### 4.5 The environmental and socio-economics of *Ulva* blooms

In order to limit environmental and economic degradation to the affected areas, a number of approaches have been suggested to obviate the problems associated with large mats of decomposing *Ulva* along the shore. These strategies involve either removing biomass to landfill or finding an alternative use for the biomass, such as animal feedstock, bioplastics, or biofuel production [65, 66, 67]. Removal of biomass to landfill or other disposal can incur large costs from transport and labour to mechanical collection [68]. Calculations by the Irish government-established Sea Lettuce Task-Force [34] estimated the cost of disposal of *Ulva* blooms on arable land at €16 per tonne compared to a landfill disposal cost of €260 per tonne. Using the estimated cost of landfill disposal, the expenditure required for removing the most severe blooms from this study would cost the following: Courtmacsherry €562,682, Clonakilty €219,765, and Tolka €139,516. On the other hand, disposal on arable land would amount to a total value of €56,737 (€34,627, €13,524, and €8,586) for the three affected sites.

Landfill and composting have been used as a means of disposal for *Ulva* blooms in France [24] and China [69]. However, the present study emphasises that bloom biomass may contain relatively high concentrations of potentially hazardous metals suggesting that such disposal methods may have other implications. Decaying *Ulva* could leach metals over time into a landfill site or over agricultural ground, and thus contaminate the surrounding soil, groundwater, or surface waters. This was evident from the risk of groundwater arsenic contamination following the application of seaweed (*Ascophyllum nodosum* (L.) Le Jol) fertiliser in a golf course setting [70]. The estimated total algal biomass from Tolka (540.19 tonnes, ww; 160 tonnes, dw, (if ww moisture level is 79.6% [71]; Table 3) could potentially comprise the following metals if the entire bloom was collected: V- 0.46 kg, Cr- 0.37 kg, Ni- 0.38 kg, Cu- 1.05 kg, As- 0.76 kg, Cd- 0.01 kg, Sn-0.04kg and Pb-1.06 kg (calculated from *Ulva* dw biomass x metal concentration). The algal bloom in Courtmacsherry (2164.16 tonnes, ww; 441.49 tonnes, dw) could contribute: V- 1.06 kg, Cr- 0.54 kg, Ni- 0.70 kg, Cu- 2.43 kg, As- 1.86 kg, Cd- 0.05 kg, Sn-0.04 kg

and Pb- 0.90 kg. While composting *Ulva* on agricultural land may be more cost-effective than landfill [34], the increase in soil metal content from *Ulva* disposal could lead to the potential contamination of crops increasing the probability of human exposure [72]. There are many factors that could influence the quantities and impact of metals released into the surrounding soil, including: land surface area used for algal disposal, interaction between the leached metals and surface soil and precipitation levels. The number of variables precludes any robust modeling of impact and highlights the possible implications of disposing the algal biomass on land, particularly when the same land is repeatedly used for algal disposal, if the collected biomass increases, or metal accumulation in the *Ulva* bloom was enhanced. Further research is required to elucidate the effects of seaweed disposal on surface soils and to provide better risk assessments for disposal of *Ulva* blooms, particularly in relation to NaCl and other salts, and their effects on soil structure [34].

Many EU and other international regulations that recommended maximum allowable limits for metals in foods, feeds and seaweeds as a food source refer only to total metal concentrations [34, 73, 74] (Table 7). In general, the blooms sampled in this study complied with most EU and Canadian regulations for metal concentrations in animal feeds (2002/32/EC [73] and RG-8 regulatory guidance [75]; contaminates in feed). Data from the Moy showed that the mean cadmium levels exceeded a Canadian regulatory limit of 0.2 mg kg<sup>-1</sup> for equine feeds,

**Table 7. International legislative/recommended maximum limits of toxic elements in foods and animal feeds (mg kg<sup>-1</sup>, dry weight).**

|                                  | Cd       | As       | Sn     | Pb      | Reference   |
|----------------------------------|----------|----------|--------|---------|-------------|
| <b>Australia and New Zealand</b> |          |          |        |         |             |
| Fish                             |          | 2*       | 250    | 0.5     | [79]        |
| Crustacean and Molluscs          | 2        | 1–2      | 250    | 2       |             |
| Seaweed                          |          | 1*       | 250    |         |             |
| Vegetables and Plants            | 0.1–0.5  |          | 250    | 0.1–0.3 |             |
| <b>Canada</b>                    |          |          |        |         |             |
| Animal Feeds                     | 0.2–0.4  | 8        |        | 8       | [76,82]     |
| Fish protein                     |          | 3.5      |        | 0.5     |             |
| Plant & Vegetable                |          | 0.1      |        | 0.2–1.5 |             |
| <b>European Union</b>            |          |          |        |         |             |
| Food (general)                   |          |          | 0.20   |         | [75,77, 78] |
| Bivalve                          | 1–3      |          |        | 1.5     |             |
| Crustacean                       | 0.5      |          |        | 0.5     |             |
| Fish                             | 0.05–0.3 |          |        | 0.3     |             |
| Plants & Vegetables              | 0.05–0.2 |          | 0.02   | 0.1–0.3 |             |
| Seaweed                          | 3.0      | 40(0.2*) |        | 10      |             |
| Calcareous algae                 |          | 10       |        |         |             |
| Animal Feeds and feedstuff       | 1–10     | 4–10     |        | 5–40    |             |
| <b>FAO</b>                       |          |          |        |         |             |
| Fish and meats                   |          |          | 50–250 | 0.1     | [81]        |
| Plants and Vegetables            | 0.05–0.4 | 0.1      | 250    | 0.1–1.5 |             |
| Crustacean and Mollusc           | 2        |          |        |         |             |
| <b>Hong Kong &amp; China</b>     |          |          |        |         |             |
| Fish and shellfish               | 2        | 6–10     | 230    | 6       | [80, 83]    |
| Plants and Vegetables            | 0.1      | 1.4      | 230    | 6       |             |
| General foods (wet weight)       | 0.2      |          |        | 0.3     |             |

\* refers to inorganic arsenic.

doi:10.1371/journal.pone.0169049.t007

but not for other livestock ( $0.4 \text{ mg kg}^{-1}$  [76], Fig 3 and Table 7). A comparison between the metal levels found in the algal blooms and the legislative limits for seaweeds in Australia, New Zealand and the European Union revealed As, Sn, Cd, and Pb were within acceptable regulatory tolerances [77, 78, 79]. In contrast to animal feeds, legal metal thresholds in foods for human consumption are lower, and consequently many of the metals determined in Irish *Ulva* blooms exceeded these limits (albeit with some extrapolation for cases where no specific 'seaweed' limit is defined). One example is Pb, where concentrations were higher than the international legal limits ( $0.1\text{--}2 \text{ mg kg}^{-1}$ ) for seafood, terrestrial animals, and plant materials [77, 76, 79, 80, 81]. Scientific knowledge on safe consumption limits and toxicological effects of metals in seaweeds remains relatively unexplored, and many of the safe tolerances of metals (other than Cd, As, Sn and Pb) are still undefined by legislation and remained unregulated. The present study showed that many of the surveyed sites could potentially be used for direct and indirect human consumption.

## Conclusion and Recommendations

The present assessment and characterisation of Irish green tides has shown that the majority of bladed *Ulva* populations forming the blooms were *U. rigida*. The greatest bloom biomass was recorded at Courtmacsherry and Clonakilty. While the highest metal concentrations were generally associated with lower bloom EQR values, no clear link between the algal WFD assessment criteria and metal content was established. In general, based on international regulations concerning algal tissue metal content, the blooms surveyed were still suitable for commercial exploitation. Further development of uses for algal bloom biomass depends on the specific application and the site-specific profile of metal concentrations. *Ulva* blooms are becoming a regular and increasingly severe problem in estuarine systems and coastal seas, and the present assessment and characterisation of algal blooms will inform decision-makers and policy regarding in the management of green macroalgal blooms.

## Acknowledgments

This study was jointly funded (Grant-Aid Agreement No. MFFRI/07/01) under the *Sea Change* Strategy with the support of the Marine Institute and the Department of Agriculture, Food and the Marine, funded under the National Development Plan 2007–2013 and the Thomas Crawford-Hayes Research Award (National University of Ireland Galway, Grant Award 2010). Dr Liam Morrison and the Chemical Monitoring Facility (CFM) were funded by the Department of Communications, Energy and Natural Resources under the National Geoscience Programme 2007–2013. The views expressed in the study are the authors' own and do not necessarily reflect the views and opinions of the Minister for Communications, Energy and Natural Resources or any government body. During the development of this work Dr Ricardo Bermejo held a postdoctoral grant from the Environmental Protection Agency in the context of Sea-MAT project—Nutrient dynamics and eco-physiology of opportunistic macroalgal blooms in Irish estuaries and coastal bays (2015-W-MS-20). Dr Svenja Heesch acknowledges funding from the Beaufort Marine Research Award carried out under the Irish *Sea Change* Strategy and the Strategy for Science Technology and Innovation (2006–2013), with the support of the Marine Institute, funded under the Marine Research Sub-Programme of the Irish National Development Plan 2007–2013. The authors would also like to acknowledge Prof. Christine Maggs for providing the primers used in the genetic analysis, and Dr Jazmin Hernandez and Mr Jim Morrissey for their assistance during field sampling. In addition, we thank Mr Pierre Vedel and Ms Laura Touzot for their help in processing samples. Special thanks go

to Dr Richard Fitzgerald, Prof. Michael Guiry, Dr Majbritt Bolton-Walberg and Ms Jessica Jane Ratcliff for their editorial comments.

## Author Contributions

**Conceptualization:** AHLW LM RJW RB.

**Data curation:** AHLW RJW SH.

**Formal analysis:** AHLW MPJ RB SH.

**Funding acquisition:** AHLW LM RJW MPJ.

**Investigation:** AHLW SH RJW.

**Methodology:** AHLW LM SH RJW.

**Project administration:** AHLW.

**Resources:** AHLW LM MPJ RJW.

**Supervision:** AHLW LM MPJ.

**Validation:** AHLW RJW SH.

**Visualization:** AHLW SH RW RB MPJ.

**Writing – original draft:** AHLW RB LM RJW SH MPJ.

**Writing – review & editing:** AHLW RJW RB SH LM MPJ.

## References

1. Lotze HK, Lenihan HS, Bourque BJ, Bradbury RH, Cooke RG, Kay MC. et al. Depletion, degradation, and recovery potential of estuaries and coastal seas. *Science*, 2006; 312: 1806–1809. doi: [10.1126/science.1128035](https://doi.org/10.1126/science.1128035) PMID: [16794081](https://pubmed.ncbi.nlm.nih.gov/16794081/)
2. Coll M, Piroddi C, Steenbeek J, Kaschner K, Ben Rais Lasram F, Aguzzi J. et al. The biodiversity of the Mediterranean Sea: estimates, patterns, and threats. *PLoS One*. 2010;(5):e11842.
3. Hering D, Borja A, Carstensen J, Carvalho L, Elliott M, Feld CK. et al. The European Water Framework Directive at the age of 10: A critical review of the achievements with recommendations for the future. *Sci Total Environ*, 2010;(408):4007–4019.
4. Arévalo R., Pinedo S., Ballesteros E. Changes in the composition and structure of Mediterranean rocky-shore communities following a gradient of nutrient enrichment: Descriptive study and test of proposed methods to assess water quality regarding macroalgae. *Mar. Pollut. Bull.* 2007; 55:104–113. doi: [10.1016/j.marpolbul.2006.08.023](https://doi.org/10.1016/j.marpolbul.2006.08.023) PMID: [17045305](https://pubmed.ncbi.nlm.nih.gov/17045305/)
5. Nielsen S.L., Sand-Jensen K., Borum J., Geertz-Hansen O. Depth colonisation of seagrasses (Zostera marina) and macroalgae as determined by water transparency in Danish coastal waters. *Estuaries* 2002; 25:1025–1032
6. Schubert H, Forster RM. Sources of variability in the factors used for modelling primary productivity in eutrophic waters. *Hydrobiologia*. 1997; 349: 75–85.
7. Chase ME, Jones SH, Hennigar P, Sowles J, Harding GC, Freeman K. et al. Gulfwatch: monitoring spatial and temporal patterns of trace metal and organic contaminants in the Gulf of Maine (1991–1997) with the blue Mussel, *Mytilus edulis*. *Mar. Pollut. Bull.* 2001;(42): 491–505.
8. Gheggour M., Chafik A., Langston W.J., Burt G.R., Benbrahim S., Texier H. Metals in sediments and the edible cockle *Cerastoderma edule* from two Moroccan Atlantic lagoons: Moulay Selham and Sidi Moussa. *Environ. Poll.* 2002;(115):149–60.
9. Schindler PW. The regulation of heavy metals in natural aquatic system. In: Vernet JP, editor. *Heavy metals in the environment*. Amsterdam: North-Holland; 1991 pp. 95–123.
10. Desideri D, Cantaluppi C, Ceccotto F, Meli MA, Roselli C, Feduzi L. Essential and toxic elements in seaweeds for human consumption. *J. Toxicol. Environ. Health A*. 2016; 79:112–122. doi: [10.1080/15287394.2015.1113598](https://doi.org/10.1080/15287394.2015.1113598) PMID: [26817952](https://pubmed.ncbi.nlm.nih.gov/26817952/)

11. Morrison L, Baumann HA, Stengel DB. An assessment of metal contamination along the Irish coast using the seaweed *Ascophyllum nodosum* (Fucales, Phaeophyceae). *Environmental pollution*. 2008; 152:293–303. doi: [10.1016/j.envpol.2007.06.052](https://doi.org/10.1016/j.envpol.2007.06.052) PMID: [17949868](https://pubmed.ncbi.nlm.nih.gov/17949868/)
12. Ostapczuk P, Schladot JD, Emons H, Oxynos K, Schramm KW, Grimmer G. et al. Environmental monitoring and banking of marine pollutants by using common mussels. *Chemosphere*. 1997; 34: 2143–2151. PMID: [9159910](https://pubmed.ncbi.nlm.nih.gov/9159910/)
13. EU. Water Framework Directive, 2000. Directive 2000/60/EC of the European Parliament and the Council of 23rd October 2000 establishing a framework for Community action in the field of water policy. *Official Journal of the European Communities*; 2000. [http://eur-lex.europa.eu/resource.html?uri=cellar:5c835afb-2ec6-4577-bdf8-756d3d694eeb.0004.02/DOC\\_1&format=pdf](http://eur-lex.europa.eu/resource.html?uri=cellar:5c835afb-2ec6-4577-bdf8-756d3d694eeb.0004.02/DOC_1&format=pdf) Accessed 20 September 2015.
14. EPA. EU Water Framework Directive Monitoring Programme, EPA; 2006. <http://www.epa.ie/pubs/reports/water/other/wfd/> Accessed 7 December 2015.
15. Ní Longphuirt S, O'Boyle S, Wilkes R, Dabrowski T, Stengel D. Influence of hydrological regime in determining the response of macroalgal blooms to nutrient loading in two Irish estuaries. *Estuaries and Coasts*. 2016; 39(2):478–494.
16. Scanlan C. M., Foden J., Wells E. and Best M. A. The monitoring of opportunistic macroalgal blooms for the water framework directive. *Mar. Pollut. Bull.* 2007; 55(1–6):162–171. Available: <http://dx.doi.org/10.1016/j.marpolbul.2006.09.017> Accessed 7 December 2015. doi: [10.1016/j.marpolbul.2006.09.017](https://doi.org/10.1016/j.marpolbul.2006.09.017) PMID: [17070853](https://pubmed.ncbi.nlm.nih.gov/17070853/)
17. Messyas B, Rybak A. Abiotic factors affecting the development of *Ulva* sp. (Ulvophyceae; Chlorophyta) in freshwater ecosystems. *Aquat Ecol.* 2011; 45(1):75–87.
18. Mamboya F, Lyimo TJ, Landberg T, Björk M. Influence of combined changes in salinity and copper modulation on growth and copper uptake in the tropical green macroalga *Ulva reticulata*. *Estuar. Coast. Shelf Sci.* 2009; 84(3):326–330.
19. Nelson TA, Haberland K, Nelson AV, Ribarich H, Hotchkiss R, Van Alstyne KL, et al. Ecological and physiological controls of species composition in green macroalgal blooms. *Ecology* 2008; 89(5):1287–1298. PMID: [18543622](https://pubmed.ncbi.nlm.nih.gov/18543622/)
20. Monteiro PMS, Anderson RJ, Woodbourne S.  $\delta^{15}N$  as a tool to demonstrate the contribution of fish-waste-derived nitrogen to an *Ulva* bloom in Saldanha Bay, South Africa. *South African J. Mar. Sci.* 1997; 18(1):1–9.
21. Keesing JK, Liu D, Fearn P, Garcia R. Inter- and intra-annual patterns of *Ulva prolifera* green tides in the Yellow Sea during 2007–2009, their origin and relationship to the expansion of coastal seaweed aquaculture in China. *Mar. Pollut. Bull.* 2011; 62(6):1169–82. doi: [10.1016/j.marpolbul.2011.03.040](https://doi.org/10.1016/j.marpolbul.2011.03.040) PMID: [21497856](https://pubmed.ncbi.nlm.nih.gov/21497856/)
22. Smetacek V, Zingone A. Green and golden seaweed tides on the rise. *Nature*. 2013; 504:84–8. doi: [10.1038/nature12860](https://doi.org/10.1038/nature12860) PMID: [24305152](https://pubmed.ncbi.nlm.nih.gov/24305152/)
23. Reiffenstein RJ, Hulbert WC, Roth SH. Toxicology of hydrogen sulfide. *Annu. Rev. Pharmacolo. Tox.* 1992; 32:109–134.
24. Charlier RH, Morand P, Finkl CW. How Brittany and Florida coasts cope with green tides. *Int. J. Environ. Stud.* 2008; 65(2):191–208.
25. Ye N, Zhang X, Mao Y, Liang C, Xu D, Zou J. et al. “Green tides” are overwhelming the coastline of our blue planet: taking the world’s largest example. *Ecol. Res.* 2011; 26:477–485.
26. Holdt SL, Kraan S. Bioactive compounds in seaweed: functional food applications and legislation. *J Appl Phycol.* 2011; 23(3):543–97.
27. Villares R, Puente X, Carballeira A. *Ulva* and *Enteromorpha* as indicators of heavy metal pollution. *Hydrobiologia.* 2001; 462(1):221–232.
28. Guidone M, Thornber CS. Examination of *Ulva* bloom species richness and relative abundance reveals two cryptically co-occurring bloom species in Narragansett Bay, Rhode Island. *Harmful Algae.* 2013; 24:1–9.
29. Yabe T., Ishii Y., Amano Y., Koga T., Hayashi S., Nohara S., Tatsumoto H. Green tide formed by free-floating *Ulva* spp. at Yatsu tidal flat, Japan. *Limnology* 2009; 10:239–245.
30. Malta E-J, Draisma SGA, Kamermans P. Free-floating *Ulva* in the southwest Netherlands: species or morphotypes? A morphological, molecular and ecological comparison. *Eur. J. Phycol.* 1999; 34(5):443–454.
31. Heesch S, Broom JES, Neill KF, Farr TJ, Dalen JL, Nelson WA. *Ulva*, *Umbraulva* and *Gemina*: genetic survey of New Zealand Ulvaceae reveals diversity and introduced species. *Eur. J. Phyco.* 2009; 44(2):143–154.



32. Jeffrey DW. Sources of nitrogen for nuisance macroalgal growths in Dublin Bay, Republic of Ireland. *Phycologist*, 1993; 34:30.
33. Fingal County Council. Ecological monitoring of Rogerstown estuary, Final report; 2003. [http://www.fingalbiodiversity.ie/resources/fingal\\_coast/2003%20Monitoring%20Rogerstown.pdf](http://www.fingalbiodiversity.ie/resources/fingal_coast/2003%20Monitoring%20Rogerstown.pdf) Accessed 14 November 2015.
34. Sea Lettuce Task Force. Sea lettuce task force report, 2010. Accessed on 10/10/14: <http://www.environ.ie/en/Foreshore/ApplicationsandDeterminations/CorkCoCl-RemovalSeaLettuce/ApplicationDetails/FileDownload,30556.en.pdf>
35. Heesch S, Pažoutová M, Moniz MJB, Rindi F. Prasiolales (Trebouxiophyceae, Chlorophyta) of the Svalbard Archipelago: diversity, biogeography, and description of the new genera Prasionella and Prasionema. *Eur. J. Phyco.* 2016; 51:171–187.
36. Ratcliff JJ, Wan AHL, Edwards MD, Soler-Vila A, Johnson MP, Abreu MH et al. Metal content of kelp (*Laminaria digitata*) co-cultivated with Atlantic salmon in an Integrated Multi-Trophic Aquaculture system. *Aquaculture*. 2016; 450:234–243.
37. Anderson M.J., Gorley R.N. & Clarke K.R. PERMANOVA+ for PRIMER: Guide to Software and Statistical Methods. PRIMER-E, Plymouth, UK. 2008.
38. Silver N.C., Dunlap W.P. Averaging correlation coefficients—should Fisher z-transformation be used? *J. Appl. Psychol.* 1987, 72:146–148.
39. Loughnane CJ, Mclvor LM, Rindi F, Stengel DB, Guiry MD. Morphology, rbcL phylogeny and distribution of distromatic *Ulva* (Ulvophyceae, Chlorophyta) in Ireland and southern Britain. *Phycologia*. 2008; 47(4):416–429.
40. Hayden HS, Blomster J, Maggs CA, Silva PC, Stanhope MJ, Waalandi JR. Linnaeus was right all along: *Ulva* and *Enteromorpha* are not distinct genera. *Eur. J. Phyco.* 2003; 38(3):277–294
41. Shimada S, Hiraoka M, Nabata S, Iima M, Masuda M. Molecular phylogenetic analyses of the Japanese *Ulva* and *Enteromorpha* (Ulvales, Ulvophyceae), with special reference to the free-floating *Ulva*. *Phycological Research*. 2003 Jun 1; 51(2):99–108.
42. Hayden HS, Waaland JR. A molecular systematic study of *Ulva* (Ulvaceae, Ulvales) from the northeast Pacific. *Phycologia*. 2004 Jul 30; 43(4):364–82.
43. Hiraoka M, Shimada S, Uenosono M, Masuda M. A new green-tide-forming alga, *Ulva ohnoi* Hiraoka et Shimada sp. nov. (Ulvales, Ulvophyceae) from Japan. *Phycological research*. 2004 Mar 1; 52(1):17–29.
44. Cotton AD. On the growth of *Ulva latissima* in excessive quantity with special reference to the *Ulva* nuisance in Belfast Lough. In: Royal Commission on Sewage Disposal. (Anon. Eds) Vol. 1 (Appendix IV), London, HMSO; 1911, pp. 121–142.
45. EPA. Water Quality in Ireland 2007–2009; 2010. [http://www.epa.ie/pubs/reports/water/waterqua/waterqualityinireland2007-2009.html#\\_VliCAmd4\\_Ig](http://www.epa.ie/pubs/reports/water/waterqua/waterqualityinireland2007-2009.html#_VliCAmd4_Ig) Accessed 15 November 2015
46. Teagasc. Agricultural catchment programme: Phase 1 report- 2008–2011. Crops, environment and land-use programme Johnstown castle environment research centre; 2013. [http://www.teagasc.ie/publications/2013/2000/ACP\\_Phase1\\_Report.pdf](http://www.teagasc.ie/publications/2013/2000/ACP_Phase1_Report.pdf). Accessed 14 November 2015.
47. Shortle G. Challenges for improving water quality. Teagasc Agri-environment conference 2014, Tullamore, Ireland; 2014. <http://www.teagasc.ie/publications/2014/3366/Agri-Env-Ger-Shortle.pdf> Accessed 20 November 2015.
48. Perrot T., Rossi N., Ménesguen A., Dumas F. Modelling green macroalgal blooms on the coasts of Brittany, France to enhance water quality management. *J. Marine Sys.* 2014; 132(0): 38–53.
49. O’Kelly CJ, Kurihara A, Shipley TC, Sherwood AR. Molecular assessment of *Ulva* spp. (Ulvophyceae, Chlorophyta) in the Hawaiian Islands. *J. Phycol.* 2010; 46(4):728–735.
50. Griepink B, Muntau H. The certification of the contents (mass fractions) of arsenic, cadmium, copper, lead, selenium and zinc in a sea lettuce (*Ulva lactuca*): CRM No.279. Commission of the European Communities; 1987. [http://www.irmm.jrc.be/html/reference\\_materials\\_catalogue/catalogue/attachements/BCR-279\\_report.pdf](http://www.irmm.jrc.be/html/reference_materials_catalogue/catalogue/attachements/BCR-279_report.pdf) Accessed 27 August 2015.
51. Lee W-Y, Wang W-X. Metal accumulation in the green macroalga *Ulva fasciata*: effects of nitrate, ammonium and phosphate. *Sci. Total Environ.* 2001; 278(1–3): 11–22. PMID: 11669259
52. Hartnett M, Wilson JG, Nash S. Irish estuaries: Water quality status and monitoring implications under the water framework directive. *Mar. Policy*. 2011; 35(6):810–818.
53. Wilson JG. Evaluation of estuarine quality status at system level using the biological quality index and the pollution load index. *Biol. Environ. Proc. R. Irish Acad.* 2003; 103B(2):49–57.
54. Walsh AW, O’Halloran J. The toxicity of leather tannery effluent to a population of the blue mussel *Mytilus edulis* (L.). *Ecotoxicology*. 1997; 6(3):137–152.

55. Rybak A, Messyasz B, Łęska B. Freshwater *Ulva* (Chlorophyta) as a bioaccumulator of selected heavy metals (Cd, Ni and Pb) and alkaline earth metals (Ca and Mg). *Chemosphere*. 2012; 89(9):1066–76. doi: [10.1016/j.chemosphere.2012.05.071](https://doi.org/10.1016/j.chemosphere.2012.05.071) PMID: [22726424](https://pubmed.ncbi.nlm.nih.gov/22726424/)
56. Aherne S, Reynolds NA, Burke DJ. Gold mineralisation in the Silurian and Ordovician of south Mayo, In: Bowden AA, Earls G, O'Connor PG, Pyne JF, editors. *The Irish Minerals Industry 1980–1990*. Dublin: Irish Association for Economic Geology; 1992. pp. 39–50.
57. Gilligan M, Costanzo A, Feely M, Rollinson GK, Timmins E, Henry T. et al. Mapping arsenopyrite alteration in a quartz vein-hosted gold deposit using microbeam analytical techniques. *Mineralog Mag*. 2016; 80:739–748.
58. Morrison L, Petrunic BM. Naturally occurring arsenic and metals in coastal streams and intertidal sediments and biota. In: Ng JC, Noller BN, Naidu R, Bundschuh J, Bhattacharya P editors. *Understanding the geological and medical interface of arsenic proceedings, 4th International Congress on Arsenic in the Environment*, Cairns, Australia; 2012.
59. Malea P, Kevrekidis T. Trace element patterns in marine macroalgae. *Sci. Total Environ*. 2014; 494-495C:144–157.
60. Gaudry A, Zeroual S, Gaie-Levrel F, Moskura M, Boujrhah F-Z, El Moursli RC. et al. Heavy metals pollution of the Atlantic marine environment by the Moroccan phosphate industry, as observed through their bioaccumulation in *Ulva lactuca*. *Water. Air. Soil Pollut*. 2006; 178(1):267–285.
61. Caliceti M, Argese E, Sfriso A, Pavoni B. Heavy metal contamination in the seaweeds of the Venice lagoon. *Chemosphere*. 2002; 47(4):443–454. PMID: [11999620](https://pubmed.ncbi.nlm.nih.gov/11999620/)
62. Ustunada M, Erduğan H, Yılmaz S, Akgul R, Aysel V. Seasonal concentrations of some heavy metals (Cd, Pb, Zn, and Cu) in *Ulva rigida* J. Agardh (Chlorophyta) from Dardanelles (Canakkale, Turkey). *Environ. Monit. Assess*. 2011; 177(1):337–42.
63. Bermejo R, Vergara JJ, Hernández I. Application and reassessment of the reduced species list index for macroalgae to assess the ecological status under the Water Framework Directive in the Atlantic coast of Southern Spain. *Ecol. Indic*. 2012; 12:46–57
64. Nriagu J, Pacyna JM. Quantitative assessment of worldwide contamination of air, water and soils by trace metals. *Nature*. 333: 134–139. doi: [10.1038/333134a0](https://doi.org/10.1038/333134a0) PMID: [3285219](https://pubmed.ncbi.nlm.nih.gov/3285219/)
65. Allen E, Browne J, Hynes S, Murphy JD. The potential of algae blooms to produce renewable gaseous fuel. *Waste Manag*. 2013; 33(11):2425–33. doi: [10.1016/j.wasman.2013.06.017](https://doi.org/10.1016/j.wasman.2013.06.017) PMID: [23850117](https://pubmed.ncbi.nlm.nih.gov/23850117/)
66. Asino H, Ai Q, Mai K. Evaluation of *Enteromorpha prolifera* as a feed component in large yellow croaker (*Pseudosciaena crocea*, Richardson, 1846) diets. *Aquac. Res*. 2011; 42(4):525–533.
67. Chiellini E, Cinelli P, Ilieva VI, Martera M. Biodegradable thermoplastic composites based on polyvinyl alcohol and algae. *Biomacromolecules*. 2008; 9(3):1007–13. doi: [10.1021/bm701041e](https://doi.org/10.1021/bm701041e) PMID: [18257530](https://pubmed.ncbi.nlm.nih.gov/18257530/)
68. Morand P, Merceron M. Macroalgal Population and Sustainability. *J. Coast. Res*. 2005; 215(5): 1009–1020.
69. Liu D, Keesing JK, He P, Wang Z, Shi Y, Wang Y. The world's largest macroalgal bloom in the Yellow Sea, China: Formation and implications. *Estuar. Coast. Shelf Sci*. 2013; 129: 2–10.
70. O'Neill A, Gupta BS, Phillips DH. Distribution of arsenic and risk assessment of activities on a golf course fertilised with arsenic-containing *Ascophyllum nodosum* seaweed. *Sci. Total Environ*. 2014; 482–483:252–9. doi: [10.1016/j.scitotenv.2014.03.006](https://doi.org/10.1016/j.scitotenv.2014.03.006) PMID: [24657370](https://pubmed.ncbi.nlm.nih.gov/24657370/)
71. Marsham S, Scott GW, Tobin ML. Comparison of nutritive chemistry of a range of temperate seaweeds. *Food Chem*. 2007; 100(4):1331–1336.
72. Nabulo G, Black CR, Young SD. Trace metal uptake by tropical vegetables grown on soil amended with urban sewage sludge. *Environ. Pollut*. 2011; 159(2):368–76. doi: [10.1016/j.envpol.2010.11.007](https://doi.org/10.1016/j.envpol.2010.11.007) PMID: [21129831](https://pubmed.ncbi.nlm.nih.gov/21129831/)
73. Arieli A., Sklan D. Kissil G. A note on the nutritive value of *Ulva lactuca* for ruminants. *Anim. Prod*. 1993; 57:329–31.
74. Wan A.H.L., Soler-Vila A., O'Keeffe D., Casburn P., Fitzgerald R., Johnson M.P. The inclusion of *Palmaria palmata* macroalgae in Atlantic salmon (*Salmo salar*) diets: effects on growth, haematology, immunity and liver function. *J. Appl. Phycol*. 2016; 28:3091–3100.
75. EU. Directive 2002/32/EC of the European parliament and of the council of 7 May 2002 on undesirable substances in animal feed; 2002. <http://eur-lex.europa.eu/legal-content/EN/TXT/PDF/?uri=CELEX:02002L0032-20131227&from=EN> Accessed 20 September 2015.
76. Canadian Food Inspection Agency RG-8 Regulatory Guidance: Contaminants in Feed (formerly RG-1, Chapter 7) Section 4: Metal Contaminants. Canada, 2012. <http://www.inspection.gc.ca/animals/feeds/regulatory-guidance/rg-8/eng/1347383943203/1347384015909?chap=4> Accessed 25 November 2015.

77. EU. Commission Regulation (EC) No 1881/2006 of 19 December 2006 setting maximum levels for certain contaminants in foodstuffs; 2006. <http://eur-lex.europa.eu/lexuriserv/lexuriserv.do?uri=oj:l:2006:364:0005:0024:en:pdf> Accessed 20 September 2015.
78. EU. Commission Regulation (EC) No 710/2009 of 5 August 2009 amending Regulation (EC) No 889/2008 laying down detailed rules for the implementation of Council Regulation (EC) No 834/2007, as regards laying down detailed rules on organic aquaculture animal and seaweed production; 2009. <http://eur-lex.europa.eu/legal-content/en/txt/pdf/?uri=celex:32009r0710&from=en> Accessed 20 September 2015.
79. Australia New Zealand Food Standards Code. Standard 1.4.1—Contaminants and Natural Toxicants-F2013C00140, Australia: Commonwealth of Australia; 2011. <http://www.comlaw.gov.au/Details/F2011C00542> Accessed 25 November 2015.
80. MHPRC. Ministry of Health of the People's Republic of China: The maximum levels of contaminants in foods (GB 2762–2005). Beijing, China; 2005.
81. FAO, WHO. Joint FAO/WHO food standards programme codex committee on contaminants in foods Fifth Session. The Hague, Netherlands, 21–25 March 2011 CF/5 INF/1; 2011. [http://ftp.fao.org/codex/meetings/CCCF/cccf5/cf05\\_INF.pdf](http://ftp.fao.org/codex/meetings/CCCF/cccf5/cf05_INF.pdf) Accessed 14 November 2015.
82. Food and drug regulations. Division 15 adulteration of food Table I; 2014. [http://laws-lois.justice.gc.ca/eng/regulations/c.r.c.,\\_c.\\_870/page-158.html#h-109](http://laws-lois.justice.gc.ca/eng/regulations/c.r.c.,_c._870/page-158.html#h-109) Accessed 14 November 2015.
83. Centre for food safety. Cap. 132V Food Adulteration (Metallic Contaminants) Regulations 3. Schedule 1–2, Hong Kong; 2007. [http://www.legislation.gov.hk/blis\\_pdf.nsf/6799165d2fee3fa94825755e0033e532/05fecbcb00468409482575ee0042bb5b/\\$file/cap\\_132v\\_e\\_b5.pdf](http://www.legislation.gov.hk/blis_pdf.nsf/6799165d2fee3fa94825755e0033e532/05fecbcb00468409482575ee0042bb5b/$file/cap_132v_e_b5.pdf) Accessed 25 November 2015.
